# Supplementary material for: A novel coordination polymer gel based on succinic acid–copper(ii) nitrate–DABCO: metal ion and counterion specific organogelation
Source: Royal Society of Chemistry journal article supplement (doi:10.1039/c2nj40182g), 2012-01-01
Supplement: c2nj40182g.pdf [file c2nj40182g.pdf]

## Electronic Supplementary Information (ESI)

### Novel coordination polymer gel based on succinic acid-copper (II) nitrate-DABCO: Metal ion and counterion specific organogelation

Koichi Tanaka\*<sup>a</sup> and Takuya Yoshimura

<sup>a</sup>Department of Chemistry and Materials Engineering, Faculty of Chemistry, Materials and Bioengineering, Kansai University, Suita, Osaka 564-8680, Japan

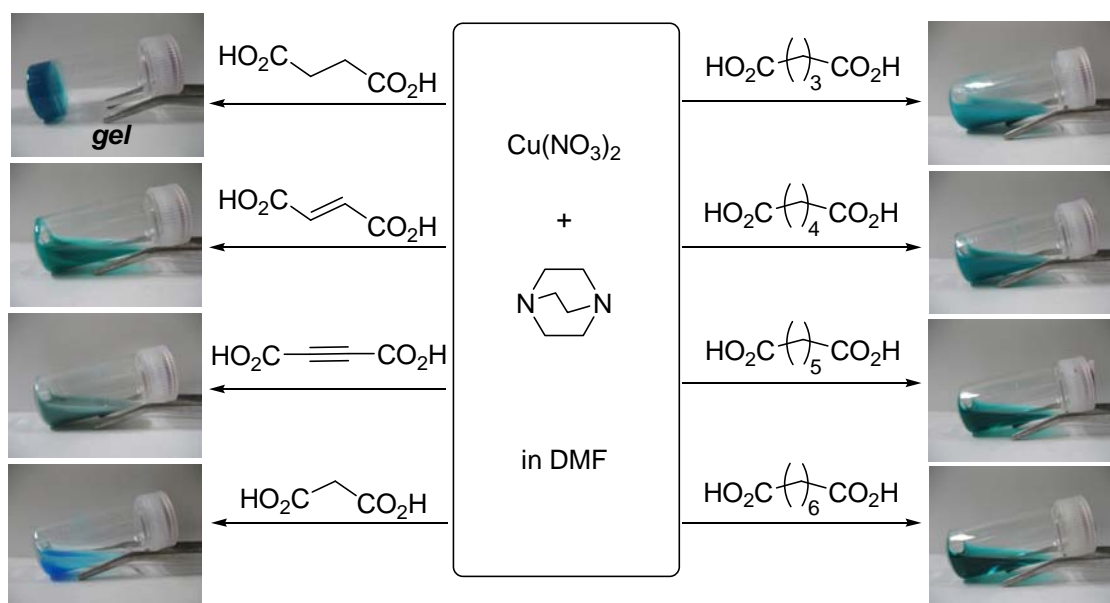

Figure S1. The photographs of gelation in the presence of various carboxylic acids.

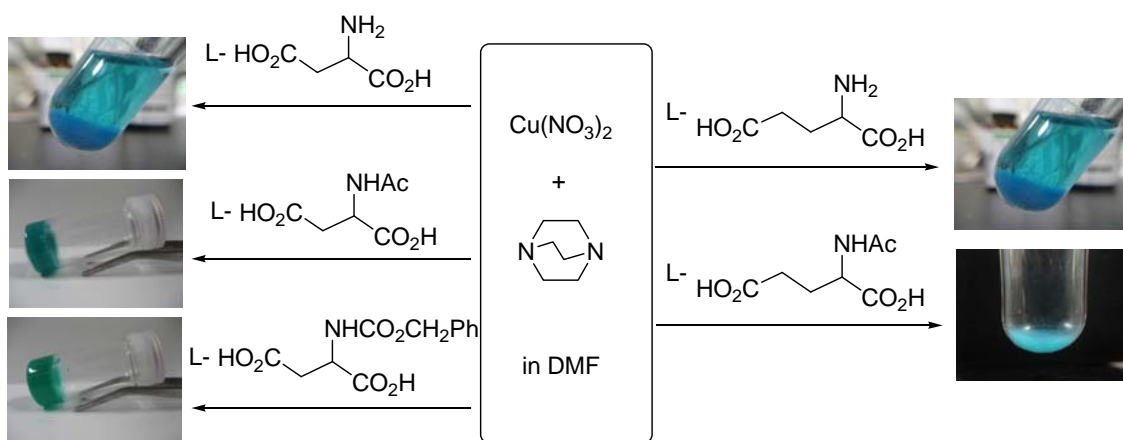

Figure S2. The photographs of gelation in the presence of various carboxylic acids.

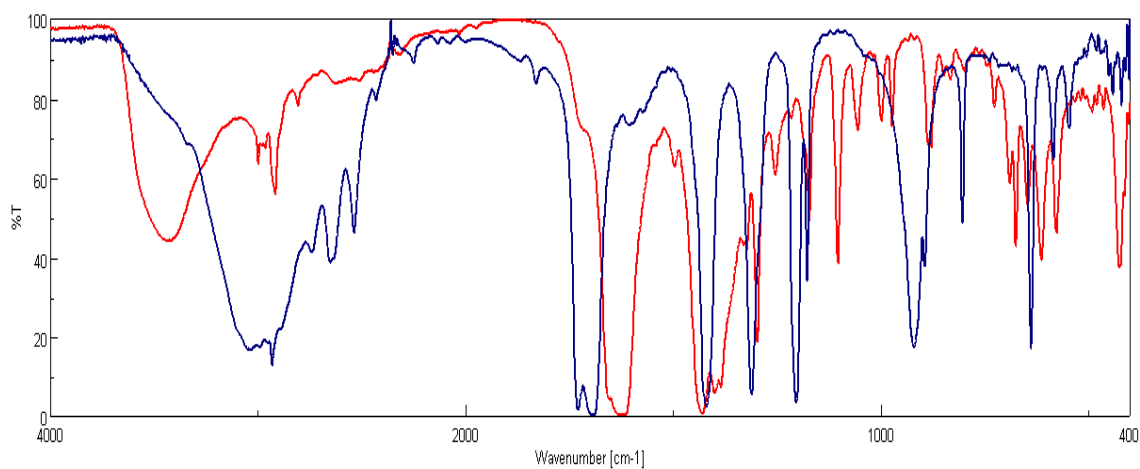

Figure S3. IR spectra of the succinic acid (blue)-DABCO-Cu(NO<sub>3</sub>)<sub>2</sub>-DMF xerogel (red).

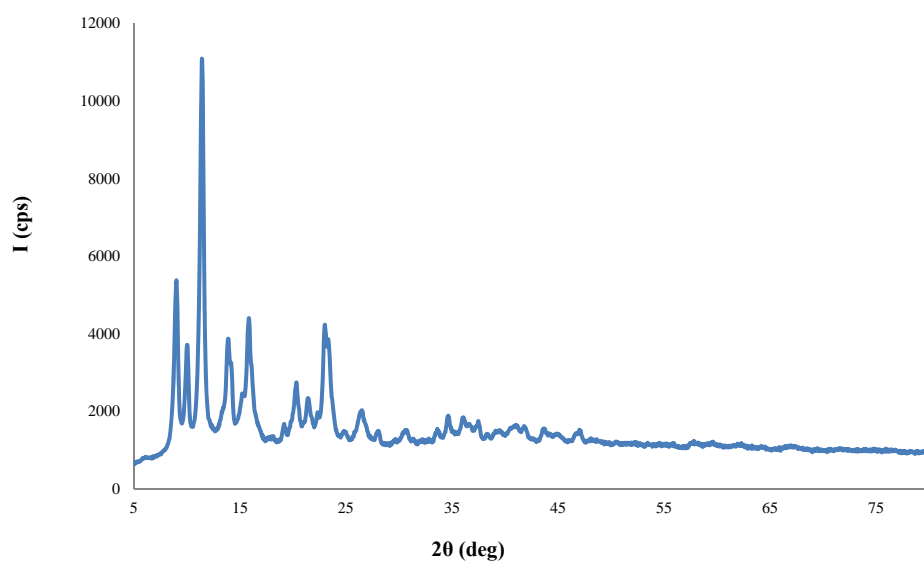

Figure S4. X-ray powder diffraction patterns of the xerogel prepared from a 1:1:1 mixture of succinic acid, Cu(NO<sub>3</sub>)<sub>2</sub>, and DABCO in DMF.
